# Supplementary material for: Reactive cycloalkane plasticizers covalently linked to energetic polyurethane bindersviafacile control of anin situCu-free azide–alkyne 1,3-dipolar cycloaddition reaction
Source: Royal Society of Chemistry journal article supplement (doi:10.1039/c8py00969d), 2018-01-01
Supplement: c8py00969d1.pdf [file c8py00969d1.pdf]

## Electronic Supplementary Information

### Reactive cycloalkane plasticizers covalently linked to energetic polyurethane binders *via* facile control of an *in situ* Cu-free azide-alkyne 1,3-dipolar cycloaddition reaction

Mingyang Ma<sup>a</sup> and Younghwan Kwon<sup>\*b</sup>

<sup>a</sup>Jiangxi Province Key Laboratory of Polymer Micro/Nano Manufacturing and Devices, East China University of Technology, Nanchang 330013, China

<sup>b</sup>Department of Chemical Engineering, Daegu University, Gyeongsan, Gyeongbuk 712-714, Korea

## Synthesis of adamantane based RCAPs

A mixture of 1-adamantanecarboxylic acid (1.000 g, 5.548 mmol), propargyl alcohol or 3-butyn-1-ol (0.622 g or 0.778 g, 11.096 mmol), *p*-TsA (0.106 g, 0.555 mmol), and toluene (20 mL) was heated in a one-necked round bottom flask equipped with the Dean-Stark trap and condenser refluxing for 12 hrs (see Scheme S1 for synthetic route). After reaction, the toluene solution was cooled down, and extracted with 10 wt.% NaCO<sub>3</sub> solution and water, respectively. The toluene solution was then collected and dried with MgSO<sub>4</sub> overnight. After dryness, the toluene solution was filtered and toluene was removed by rotary evaporator to give the crude liquid product. The final crude product was purified by flash column chromatography to give yellow liquid (silica gel, ethyl acetate/ hexane (v/v) = 3/1).

PAC (*n*=1): Yield 93.2%. <sup>1</sup>H NMR (300 MHz, CDCl<sub>3</sub>): δ = 1.67 ppm (m, 6H, CH-CH<sub>2</sub>-CH), 1.87 ppm (m, 6H, CH-CH<sub>2</sub>-C), 1.98 ppm (m, 3H, CH<sub>2</sub>-CH-CH<sub>2</sub>), 2.43 ppm (t, *J*=2.5 Hz, 1H, ≡C-H), 4.60 ppm (d, *J*=4.7 Hz, 2H, -CH<sub>2</sub>-C≡). <sup>13</sup>C NMR (75 MHz, CDCl<sub>3</sub>, ppm): δ = 28.0, 36.6, 38.8, 40.8, 52.0, 74.8, 78.3, 177.0. FT-IR (neat, cm<sup>-1</sup>): 3297 (≡C-H), 2905 (CH<sub>2</sub>), 2851 (CH), 2127 (C≡C), 1729 (C=O).

BAC (*n*=2): Yield 95.6%. <sup>1</sup>H NMR (300 MHz, CDCl<sub>3</sub>): δ = 1.65 ppm (m, 6H, CH-CH<sub>2</sub>-CH), 1.83 ppm (m, 6H, CH-CH<sub>2</sub>-C), 2.00 ppm (m, 3H, CH<sub>2</sub>-CH-CH<sub>2</sub>), 2.01 ppm (t, *J*=2.9 Hz, 1H, ≡C-H), 2.46 ppm (m, 2H, -CH<sub>2</sub>-C≡), 4.09 ppm (t, *J*=4.3 Hz, 2H, O-CH<sub>2</sub>). <sup>13</sup>C NMR (75 MHz, CDCl<sub>3</sub>, ppm): δ = 19.2, 28.1, 36.6, 38.9, 40.8, 61.8, 70.0, 80.3, 177.5. FT-IR (neat, cm<sup>-1</sup>): 3304 (≡C-H), 2905 (CH<sub>2</sub>), 2851 (CH), 2121 (C≡C), 1726 (C=O).

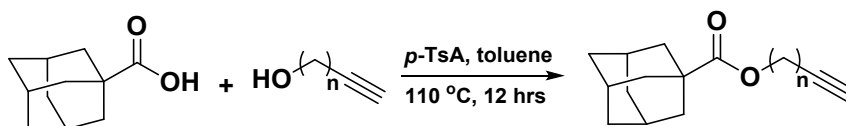

**Scheme S1.** Synthetic route to PAC (*n*=1) and BAC (*n*=2).

## Synthesis of norbornane based RCAPs

A mixture of norbornane-2-carboxylic acid (1.000 g, 7.134 mmol), propargyl alcohol or 3-butyn-1-ol (0.799 g or 0.999 g, 14.267 mmol), *p*-TsA (0.136 g, 0.713 mmol) and toluene (20 mL) was heated in a one-necked round bottom flask equipped with the Dean-Stark trap and condenser refluxing for 12 hrs (see Scheme S2 for synthetic route). After reaction, the toluene solution was cooled down, and extracted with 10 wt.% NaCO<sub>3</sub> solution and water, respectively. The toluene solution was then collected and dried with MgSO<sub>4</sub> overnight. After dryness, the toluene solution was filtered and toluene was removed by rotary evaporator to give the crude liquid product. The final crude product was purified by flash column chromatography to give light yellow liquid (silica gel, ethyl acetate/ hexane (v/v) = 3/1).

PBCHC (*n*=1): Yield 94.2%. <sup>1</sup>H NMR (300 MHz, CDCl<sub>3</sub>): δ = 1.24 - 1.73 ppm (m, 2H, 2H, 1H, 1H, 2H, -C-CH<sub>2</sub>-C-, -C-CH<sub>2</sub>-C-, -C-CH-C-, -C-CH-C-, -C-CH<sub>2</sub>-C-), 2.24 ppm (s, 1H, -C-CH-COO-), 2.44 ppm (t, *J*=2.6 Hz, 1H, ≡C-H), 2.58 ppm (s, 1H, -C-CH<sub>2</sub>-C-), 2.78 ppm (s, 1H, -C-CH<sub>2</sub>-C-), 4.67 ppm (m, *J*=4.4 Hz, 2H, -CH<sub>2</sub>-C≡). <sup>13</sup>C NMR (75 MHz, CDCl<sub>3</sub>, ppm) δ = 25.0, 29.2, 32.0, 37.1, 40.3, 40.8, 45.8, 51.9, 74.7, 78.2, 174.4. FT-IR (neat, cm<sup>-1</sup>): 3299 (≡C-H), 2951 (CH<sub>2</sub>), 2869 (CH), 2122 (C≡C), 1733 (C=O).

BBCHC (*n*=2): Yield 93.6%. <sup>1</sup>H NMR (300 MHz, CDCl<sub>3</sub>): δ = 1.24 - 1.74 ppm (m, 2H, 2H, 1H, 1H, 2H, -C-CH<sub>2</sub>-C-, -C-CH<sub>2</sub>-C-, -C-CH-C-, -C-CH-C-, -C-CH<sub>2</sub>-C-), 2.00 ppm (t, *J*=2.8 Hz, 1H, ≡C-H), 2.24 ppm (s, 1H, -C-CH-C-), 2.49 - 2.54 ppm (m, 2H, 1H, -CH<sub>2</sub>-C≡, -C-CH<sub>2</sub>-C-), 2.78 ppm (s, 1H, -C-CH<sub>2</sub>-C-), 4.18 ppm (m, 2H, O-CH<sub>2</sub>). <sup>13</sup>C NMR (75MHz, CDCl<sub>3</sub>, ppm) δ = 19.2, 25.0, 29.2, 32.0, 37.1, 40.3, 40.9, 46.0, 62.0, 70.0, 80.4, 175.0. FT-IR (neat, cm<sup>-1</sup>): 3297 (≡C-H), 2956 (CH<sub>2</sub>), 2873 (CH), 2122 (C≡C), 1732 (C=O).

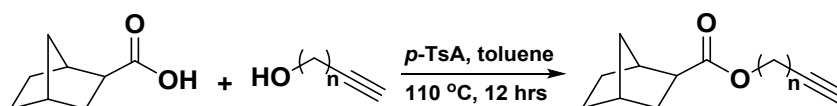

**Scheme S2.** Synthetic route to the PBCHC (*n*=1) and BBCHC (*n*=2).

### **Preparation of GAP-based PU binders with RCAPs**

GAP polyol (8.930 g, 1.62 mmol) was dried at 60 °C under vacuum for 1 hr and cooled to room temperature for 0.5 hr. The vacuum was then released and IPDI (0.504 g, 2.27 mmol) was added rapidly to GAP polyol. After stirring for 0.5 hr at room temperature, the predetermined amount of RCAPs based on the molar ratio of [acetylene group in RCAPs]/[azide group in GAP], two catalysts triphenyl bismuth (0.03 g, 20 wt.% in benzene) and 3,5-dinitro salicylic acid (0.05 g, 12.5 wt.% in benzene) was added and stirred for another 0.5 hr under vacuum. The mixture was then cast on a Teflon coated mold (5 cm × 8 cm), kept under vacuum at 30 °C for 3 hrs to remove the bubbles formed during the casting process, and then subject to curing. The curing process was carried out in an oven at 60 °C for 7 days. The control GAP-based PU binder was also prepared using the same procedure.

### **Cu-free 1,3-DPCA reaction between GAP and RCAPs**

The azide-alkyne 1,3-DPCA reactivity of RCAPs was studied with GAP prepolymer under bulk conditions. A total of 1.0 g of the RCAP/GAP mixture ( $[C\equiv C]/[-N_3]=0.5:1$ ) was mixed thoroughly in a vial. The mixture was then placed in an oven at 60 °C. A constant amount of sample was collected each time and dissolved in DMSO- $d_6$  to measure the conversion of the 1,3-DPCA reaction using a  $^1H$  NMR spectrometer until the end of the 1,3-DPCA reaction.

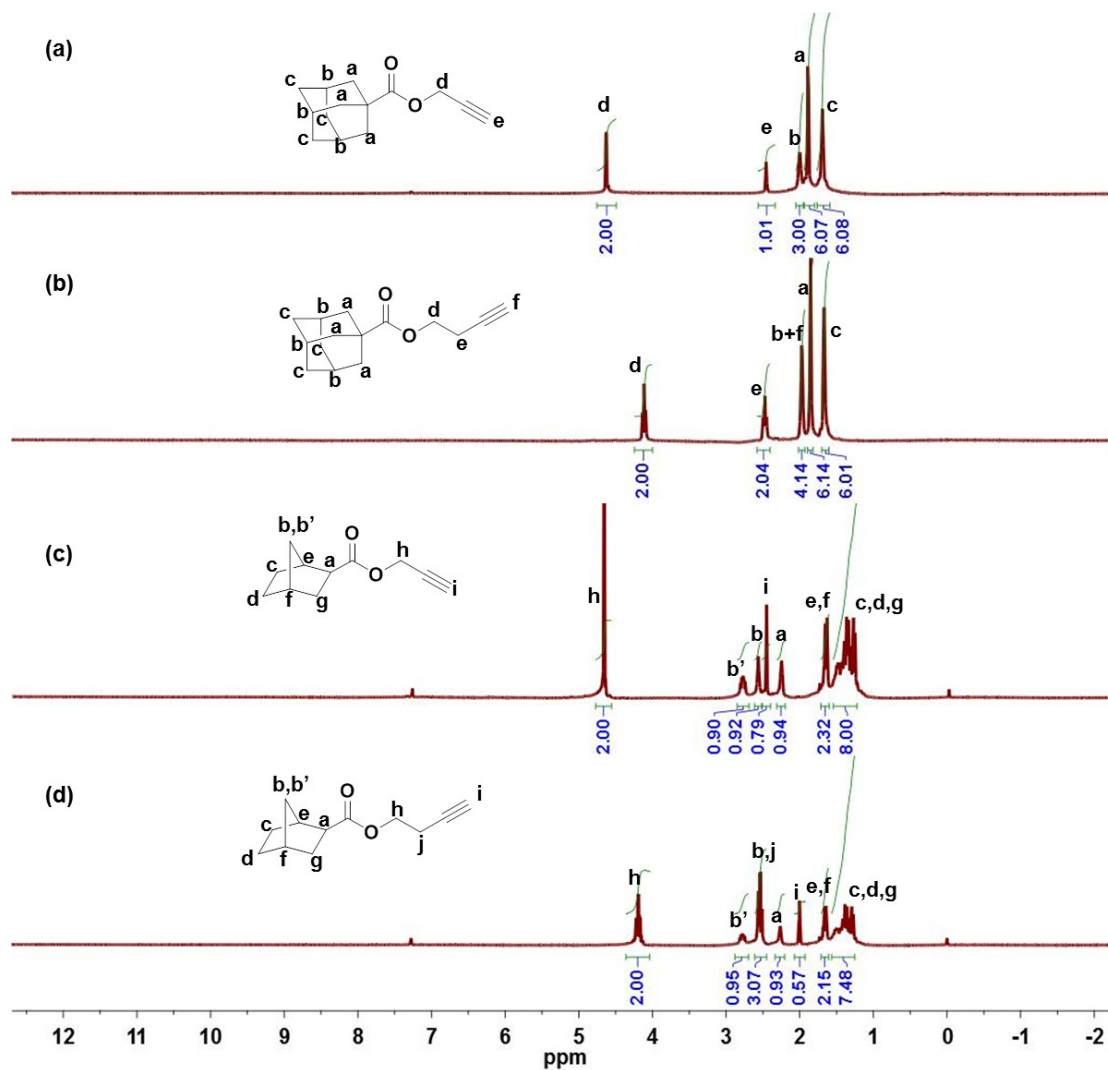

**Fig. S1.** <sup>1</sup>H NMR spectra of (a) PAC, (b) BAC, (c) PBCHC and (d) BBCHC.

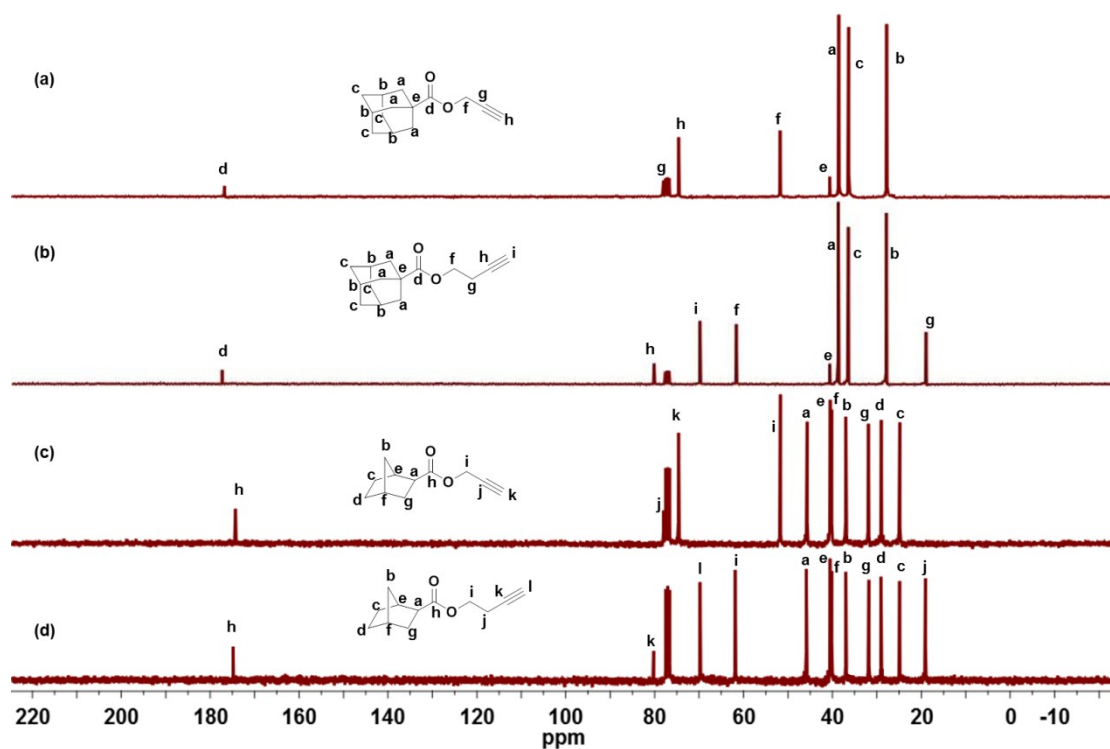

**Fig. S2.**  $^{13}\text{C}$  NMR spectra of (a) PAC, (b) BAC, (c) PBCHC and (d) BBCHC.

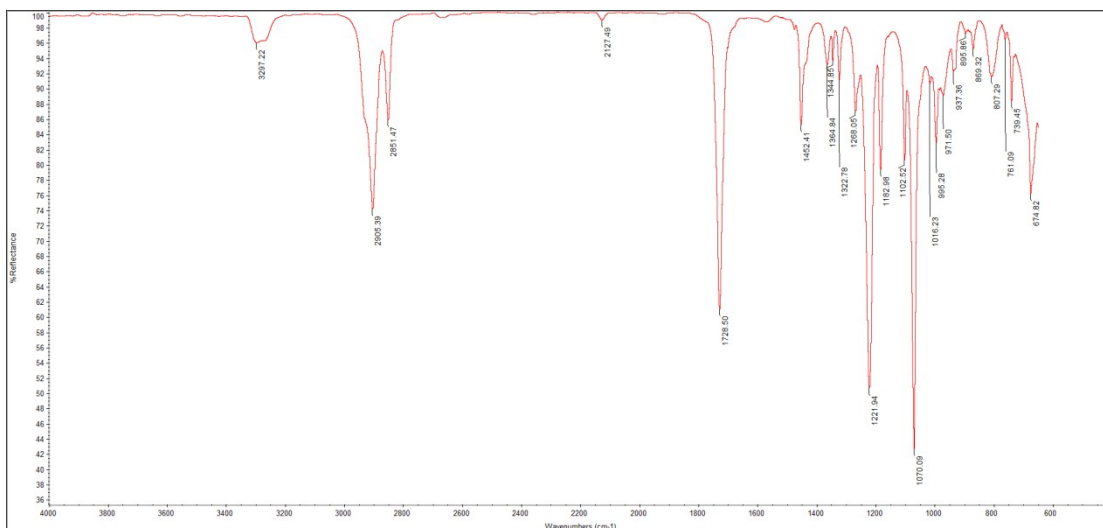

**Fig. S3.** FT-IR spectrum (neat) of PAC.

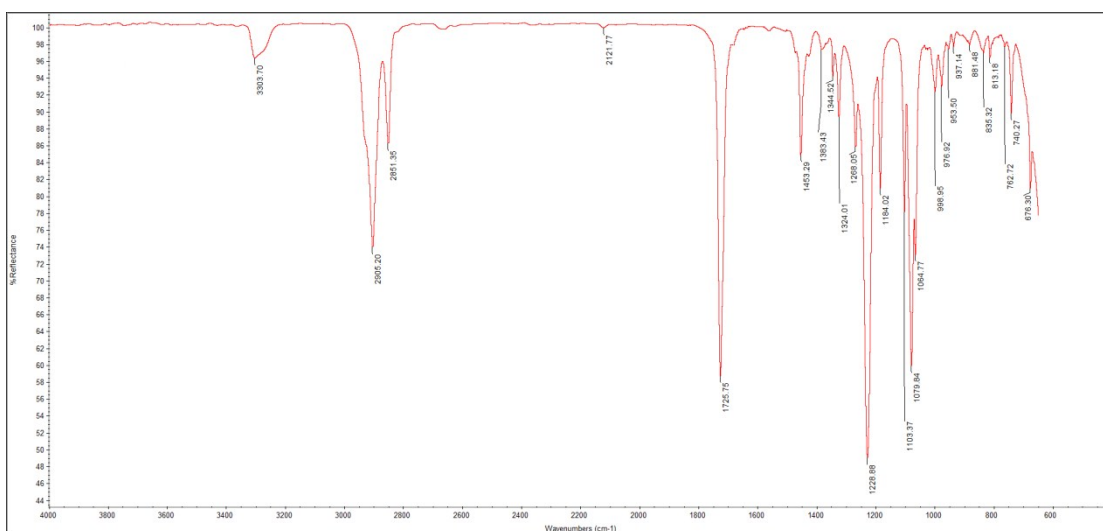

**Fig. S4.** FT-IR spectrum (neat) of BAC.

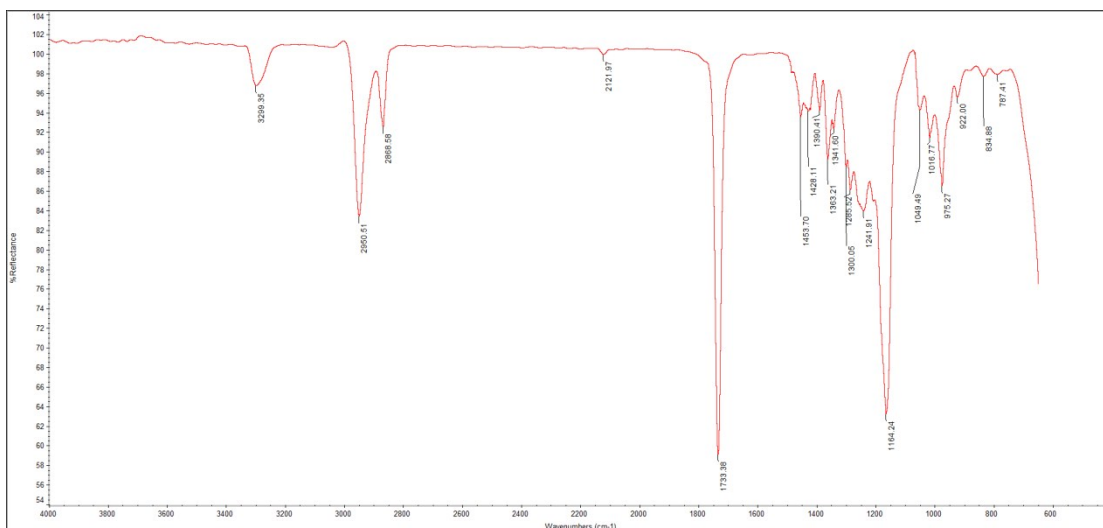

**Fig. S5.** FT-IR spectrum (neat) of PBCHC.

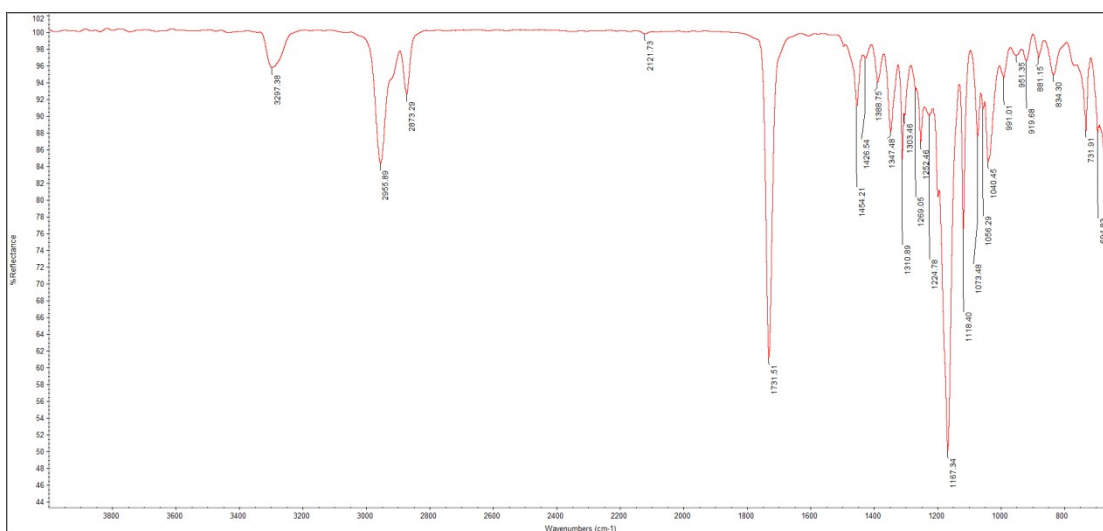

**Fig. S6.** FT-IR spectrum (neat) of BBCHC.



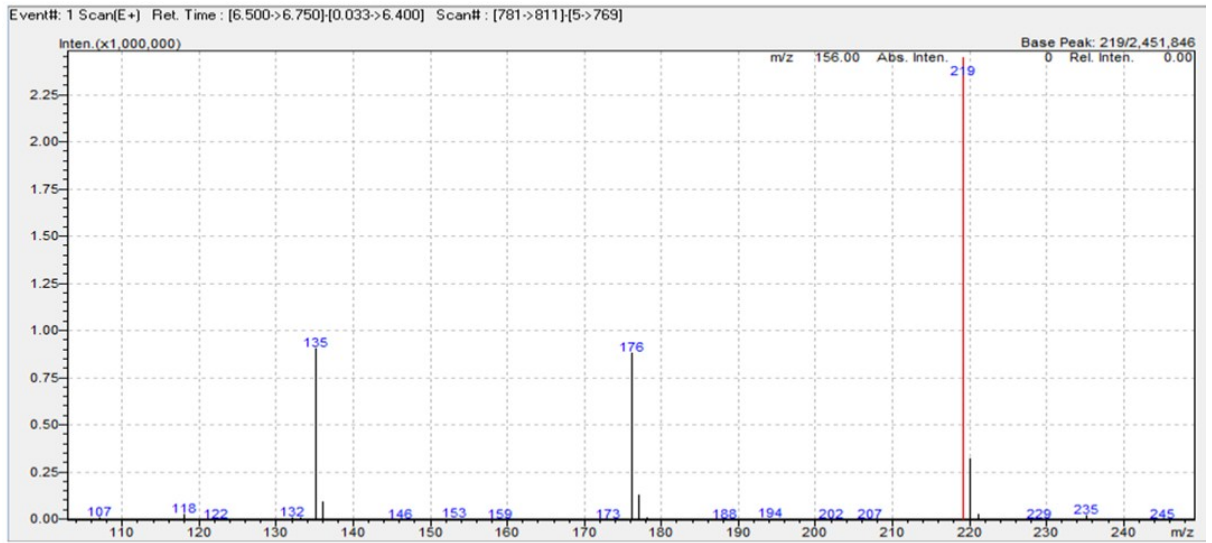

**Fig. S7.** Mass spectrum of PAC.

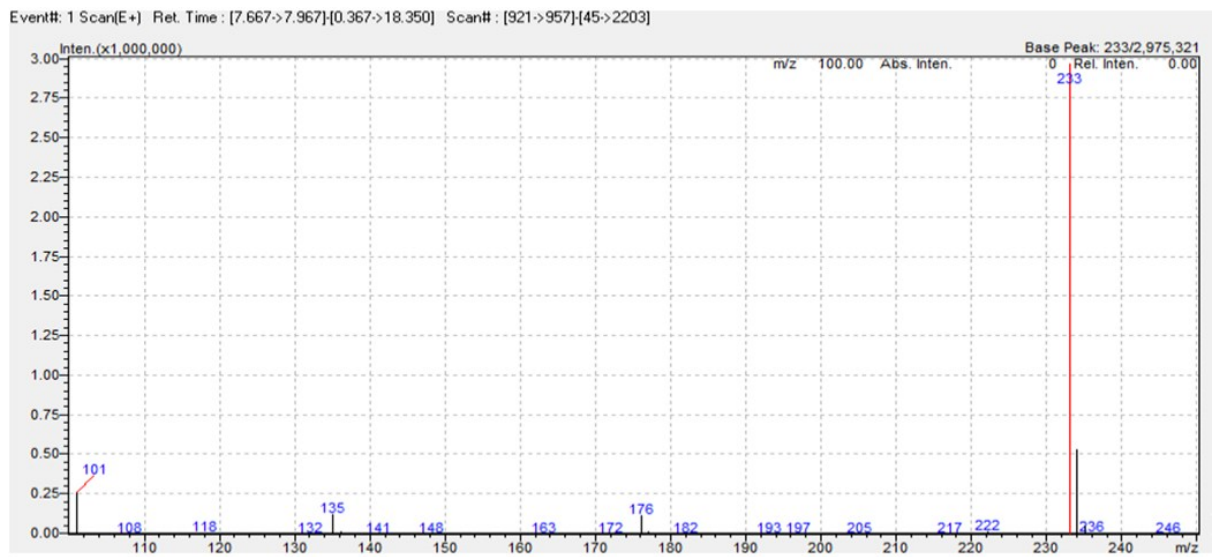

**Fig. S8.** Mass spectrum of BAC.

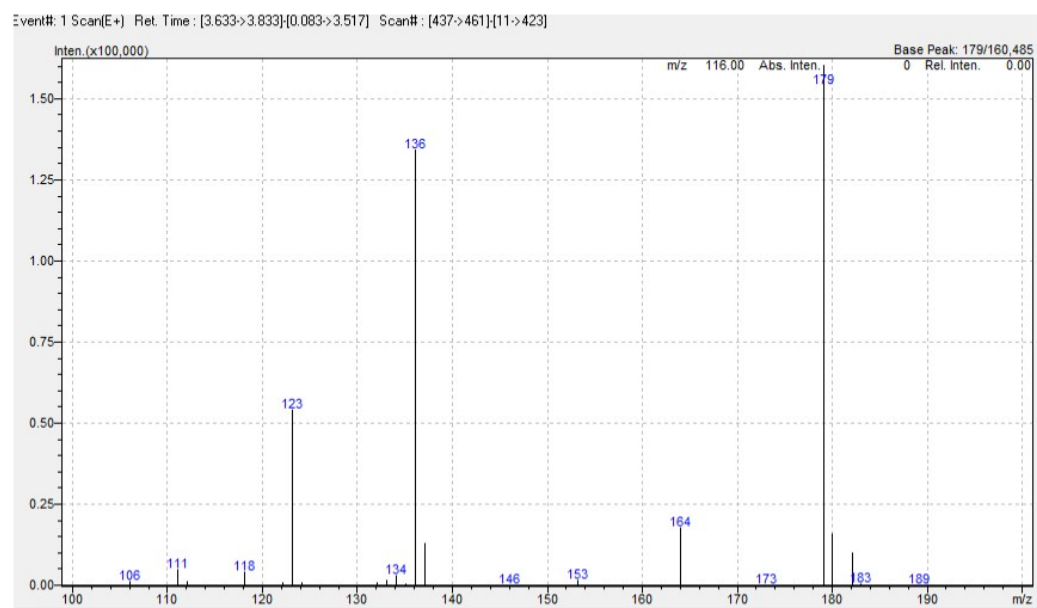

**Fig. S9.** Mass spectrum of PBCHC.

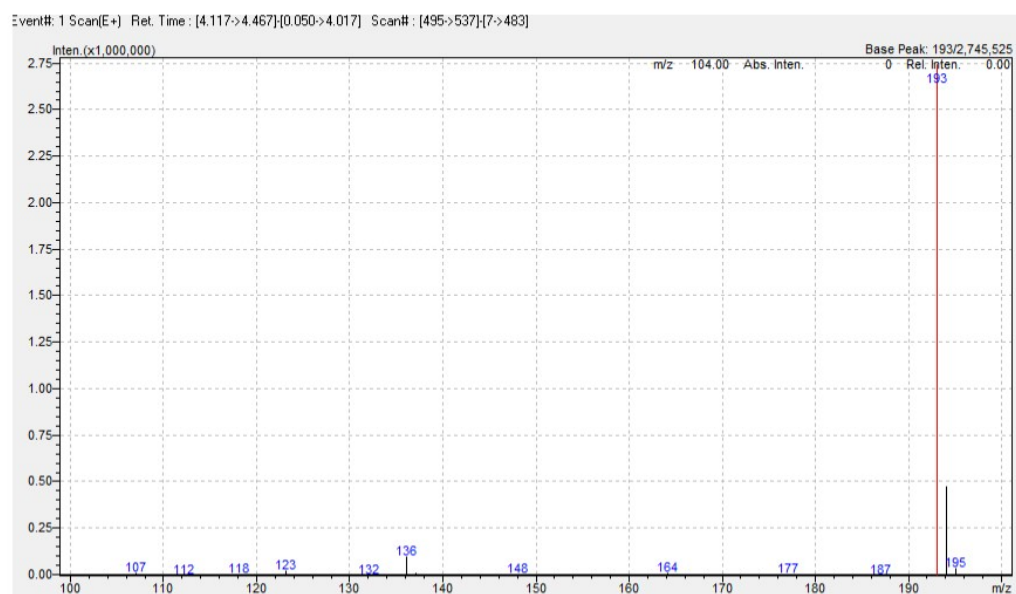

**Fig. S10.** Mass spectrum of BBCHC.

B3LYP/6-31G\* Total Energies in hartrees.

Cartesian coordinates in Å.

All structures have zero imaginary frequencies.

The second column refers to the atom type: 1=hydrogen, 6=carbon, etc.

**PAC**

E(RB+HF-LYP) = -694.7332802

Sum of electronic and zero-point Energies=

-694.437078

|    |   |   |           |           |           |
|----|---|---|-----------|-----------|-----------|
| 1  | 6 | 0 | -0.973134 | 0.283025  | -1.246789 |
| 2  | 1 | 0 | 0.146652  | 0.283025  | -1.246789 |
| 3  | 1 | 0 | -1.319425 | 1.347909  | -1.246789 |
| 4  | 6 | 0 | -1.489796 | -0.428571 | 0.000000  |
| 5  | 6 | 0 | -1.490091 | -0.428747 | -2.493341 |
| 6  | 1 | 0 | -1.109525 | 0.095468  | -3.409730 |
| 7  | 6 | 0 | -1.000356 | -1.873710 | -2.491914 |
| 8  | 1 | 0 | 0.119164  | -1.894878 | -2.504445 |
| 9  | 1 | 0 | -1.366850 | -2.399437 | -3.410169 |
| 10 | 6 | 0 | -1.000007 | -1.873521 | -0.001406 |
| 11 | 1 | 0 | -1.366209 | -2.399141 | 0.917029  |
| 12 | 1 | 0 | 0.119516  | -1.894641 | 0.010782  |
| 13 | 6 | 0 | -1.516946 | -2.587812 | -1.246533 |
| 14 | 1 | 0 | -1.156129 | -3.650451 | -1.246504 |
| 15 | 6 | 0 | -3.042497 | -2.567072 | -1.246345 |
| 16 | 1 | 0 | -3.429299 | -3.099714 | -2.152209 |
| 17 | 1 | 0 | -3.429036 | -3.099570 | -0.340284 |
| 18 | 6 | 0 | -3.015378 | -0.410356 | -0.001219 |
| 19 | 1 | 0 | -3.382164 | 0.647575  | 0.011199  |
| 20 | 1 | 0 | -3.401612 | -0.921501 | 0.917194  |
| 21 | 6 | 0 | -3.015677 | -0.410431 | -2.491696 |
| 22 | 1 | 0 | -3.382376 | 0.647537  | -2.503983 |
| 23 | 1 | 0 | -3.402224 | -0.921498 | -3.410012 |
| 24 | 6 | 0 | -3.534598 | -1.122913 | -1.246379 |
| 25 | 1 | 0 | -4.656735 | -1.108873 | -1.246230 |
| 26 | 6 | 0 | -0.967287 | 0.291004  | 1.257297  |
| 27 | 8 | 0 | -0.264700 | -0.128957 | 2.175756  |
| 28 | 8 | 0 | -1.371304 | 1.585160  | 1.315082  |
| 29 | 6 | 0 | -0.866935 | 2.217722  | 2.494225  |
| 30 | 1 | 0 | 0.202628  | 2.188610  | 2.484890  |
| 31 | 1 | 0 | -1.230231 | 1.702305  | 3.358668  |
| 32 | 6 | 0 | -1.340264 | 3.682655  | 2.533354  |
| 33 | 6 | 0 | -1.707555 | 4.819404  | 2.563717  |
| 34 | 1 | 0 | -2.033661 | 5.828686  | 2.590676  |

**BAC**

E(RB+HF-LYP) = -734.0530006

Sum of electronic and zero-point Energies=

-733.727944

|    |   |   |           |           |           |
|----|---|---|-----------|-----------|-----------|
| 1  | 6 | 0 | -0.888158 | 1.924342  | 0.000000  |
| 2  | 1 | 0 | 0.231628  | 1.924342  | 0.000000  |
| 3  | 1 | 0 | -1.234449 | 2.989226  | 0.000000  |
| 4  | 6 | 0 | -1.404820 | 1.212746  | 1.246789  |
| 5  | 6 | 0 | -1.405115 | 1.212570  | -1.246552 |
| 6  | 1 | 0 | -1.024549 | 1.736785  | -2.162941 |
| 7  | 6 | 0 | -0.915380 | -0.232393 | -1.245125 |
| 8  | 1 | 0 | 0.204140  | -0.253561 | -1.257656 |
| 9  | 1 | 0 | -1.281874 | -0.758120 | -2.163380 |
| 10 | 6 | 0 | -0.915031 | -0.232204 | 1.245383  |
| 11 | 1 | 0 | -1.281233 | -0.757824 | 2.163818  |
| 12 | 1 | 0 | 0.204492  | -0.253324 | 1.257571  |
| 13 | 6 | 0 | -1.431970 | -0.946495 | 0.000256  |
| 14 | 1 | 0 | -1.071153 | -2.009134 | 0.000285  |
| 15 | 6 | 0 | -2.957521 | -0.925755 | 0.000444  |
| 16 | 1 | 0 | -3.344323 | -1.458397 | -0.905420 |
| 17 | 1 | 0 | -3.344060 | -1.458253 | 0.906505  |
| 18 | 6 | 0 | -2.930402 | 1.230961  | 1.245570  |
| 19 | 1 | 0 | -3.297188 | 2.288892  | 1.257988  |
| 20 | 1 | 0 | -3.316636 | 0.719816  | 2.163983  |
| 21 | 6 | 0 | -2.930701 | 1.230886  | -1.244907 |
| 22 | 1 | 0 | -3.297400 | 2.288854  | -1.257194 |
| 23 | 1 | 0 | -3.317248 | 0.719819  | -2.163223 |
| 24 | 6 | 0 | -3.449622 | 0.518404  | 0.000410  |
| 25 | 1 | 0 | -4.571759 | 0.532444  | 0.000559  |
| 26 | 6 | 0 | -0.882311 | 1.932321  | 2.504086  |
| 27 | 8 | 0 | -0.179724 | 1.512360  | 3.422545  |
| 28 | 8 | 0 | -1.286328 | 3.226478  | 2.561871  |
| 29 | 6 | 0 | -0.781959 | 3.859039  | 3.741014  |
| 30 | 1 | 0 | 0.287604  | 3.829927  | 3.731679  |
| 31 | 1 | 0 | -1.145255 | 3.343623  | 4.605457  |
| 32 | 6 | 0 | -1.255288 | 5.323972  | 3.780143  |
| 33 | 1 | 0 | -2.324865 | 5.353129  | 3.787600  |
| 34 | 1 | 0 | -0.890437 | 5.839866  | 2.916640  |
| 35 | 6 | 0 | -0.714339 | 6.004439  | 5.051339  |
| 36 | 6 | 0 | -0.294577 | 6.532464  | 6.037754  |
| 37 | 1 | 0 | 0.078116  | 7.001279  | 6.913558  |

**PBCHC**

E(RB+HF-LYP) = -577.9777013

Sum of electronic and zero-point Energies=

-577.747599

|    |   |   |           |           |           |
|----|---|---|-----------|-----------|-----------|
| 1  | 6 | 0 | -2.814323 | -1.148988 | 1.389192  |
| 2  | 6 | 0 | -1.272613 | -1.148988 | 1.389192  |
| 3  | 6 | 0 | -1.813728 | 1.060012  | 1.389192  |
| 4  | 6 | 0 | -3.180894 | 0.347501  | 1.389380  |
| 5  | 1 | 0 | -3.222727 | -1.672810 | 0.493680  |
| 6  | 1 | 0 | -3.205949 | -1.656877 | 2.302370  |
| 7  | 1 | 0 | -3.785417 | 0.623448  | 0.494088  |
| 8  | 1 | 0 | -3.762577 | 0.616617  | 2.302891  |
| 9  | 6 | 0 | -0.969987 | 0.095915  | 2.262705  |
| 10 | 1 | 0 | 0.109219  | 0.360309  | 2.282942  |
| 11 | 1 | 0 | -1.354614 | 0.001716  | 3.301054  |
| 12 | 6 | 0 | -0.816949 | -0.659759 | 0.000131  |
| 13 | 1 | 0 | 0.282943  | -0.801939 | -0.123748 |
| 14 | 1 | 0 | -1.336667 | -1.211102 | -0.817842 |
| 15 | 6 | 0 | -1.183673 | 0.836735  | 0.000000  |
| 16 | 1 | 0 | -1.899491 | 1.085050  | -0.817990 |
| 17 | 1 | 0 | -0.812337 | -2.099481 | 1.716279  |
| 18 | 1 | 0 | -1.844852 | 2.115596  | 1.716406  |
| 19 | 6 | 0 | 0.071447  | 1.712495  | -0.171221 |
| 20 | 8 | 0 | 1.111136  | 1.743607  | 0.485773  |
| 21 | 8 | 0 | -0.034731 | 2.564478  | -1.222060 |
| 22 | 6 | 0 | 1.147855  | 3.358590  | -1.347665 |
| 23 | 1 | 0 | 1.290355  | 3.929954  | -0.454280 |
| 24 | 1 | 0 | 1.992154  | 2.719334  | -1.500676 |
| 25 | 6 | 0 | 1.001157  | 4.311499  | -2.548516 |
| 26 | 6 | 0 | 0.887323  | 5.050932  | -3.480345 |
| 27 | 1 | 0 | 0.786253  | 5.707449  | -4.307685 |

**BBCHC**

E(RB+HF-LYP) = -617.2976076

Sum of electronic and zero-point Energies=

-617.038594

|    |   |   |           |           |           |
|----|---|---|-----------|-----------|-----------|
| 1  | 6 | 0 | 0.193929  | 0.059022  | 0.000000  |
| 2  | 6 | 0 | 1.735639  | 0.059022  | 0.000000  |
| 3  | 6 | 0 | 1.194524  | 2.268022  | 0.000000  |
| 4  | 6 | 0 | -0.172642 | 1.555511  | 0.000188  |
| 5  | 1 | 0 | -0.214475 | -0.464800 | -0.895512 |
| 6  | 1 | 0 | -0.197697 | -0.448867 | 0.913178  |
| 7  | 1 | 0 | -0.777165 | 1.831458  | -0.895104 |
| 8  | 1 | 0 | -0.754325 | 1.824627  | 0.913699  |
| 9  | 6 | 0 | 2.038265  | 1.303925  | 0.873513  |
| 10 | 1 | 0 | 3.117471  | 1.568319  | 0.893750  |
| 11 | 1 | 0 | 1.653638  | 1.209726  | 1.911862  |
| 12 | 6 | 0 | 2.191303  | 0.548251  | -1.389061 |
| 13 | 1 | 0 | 3.291195  | 0.406071  | -1.512940 |
| 14 | 1 | 0 | 1.671585  | -0.003092 | -2.207034 |
| 15 | 6 | 0 | 1.824579  | 2.044745  | -1.389192 |
| 16 | 1 | 0 | 1.108761  | 2.293060  | -2.207182 |
| 17 | 1 | 0 | 2.195915  | -0.891471 | 0.327087  |
| 18 | 1 | 0 | 1.163400  | 3.323606  | 0.327214  |
| 19 | 6 | 0 | 3.079699  | 2.920506  | -1.560413 |
| 20 | 8 | 0 | 4.119388  | 2.951617  | -0.903419 |
| 21 | 8 | 0 | 2.973522  | 3.772488  | -2.611252 |
| 22 | 6 | 0 | 4.156108  | 4.566600  | -2.736857 |
| 23 | 1 | 0 | 4.298608  | 5.137965  | -1.843472 |
| 24 | 1 | 0 | 5.000406  | 3.927344  | -2.889868 |
| 25 | 6 | 0 | 4.009410  | 5.519509  | -3.937708 |
| 26 | 1 | 0 | 3.856568  | 4.948456  | -4.829581 |
| 27 | 1 | 0 | 3.171302  | 6.165717  | -3.779937 |
| 28 | 6 | 0 | 5.288936  | 6.364252  | -4.082001 |
| 29 | 6 | 0 | 6.281816  | 7.019751  | -4.193968 |
| 30 | 1 | 0 | 7.163360  | 7.601746  | -4.293380 |

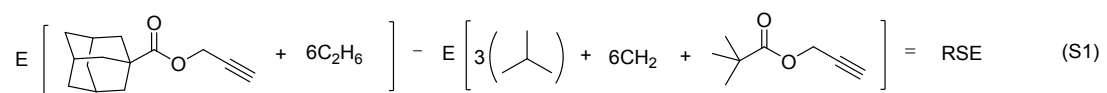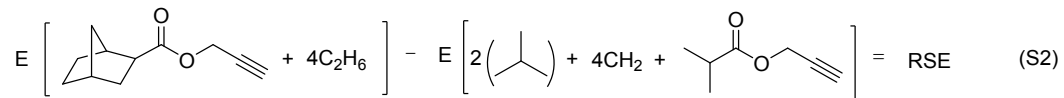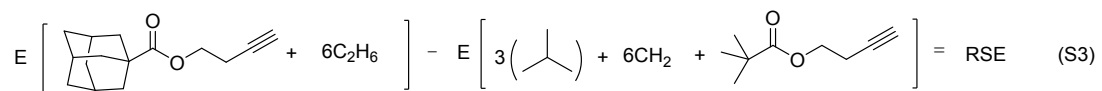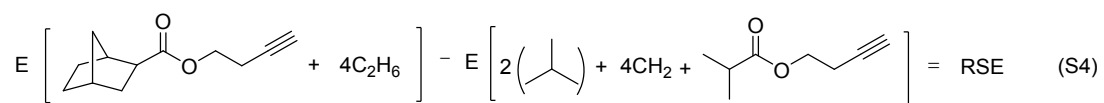

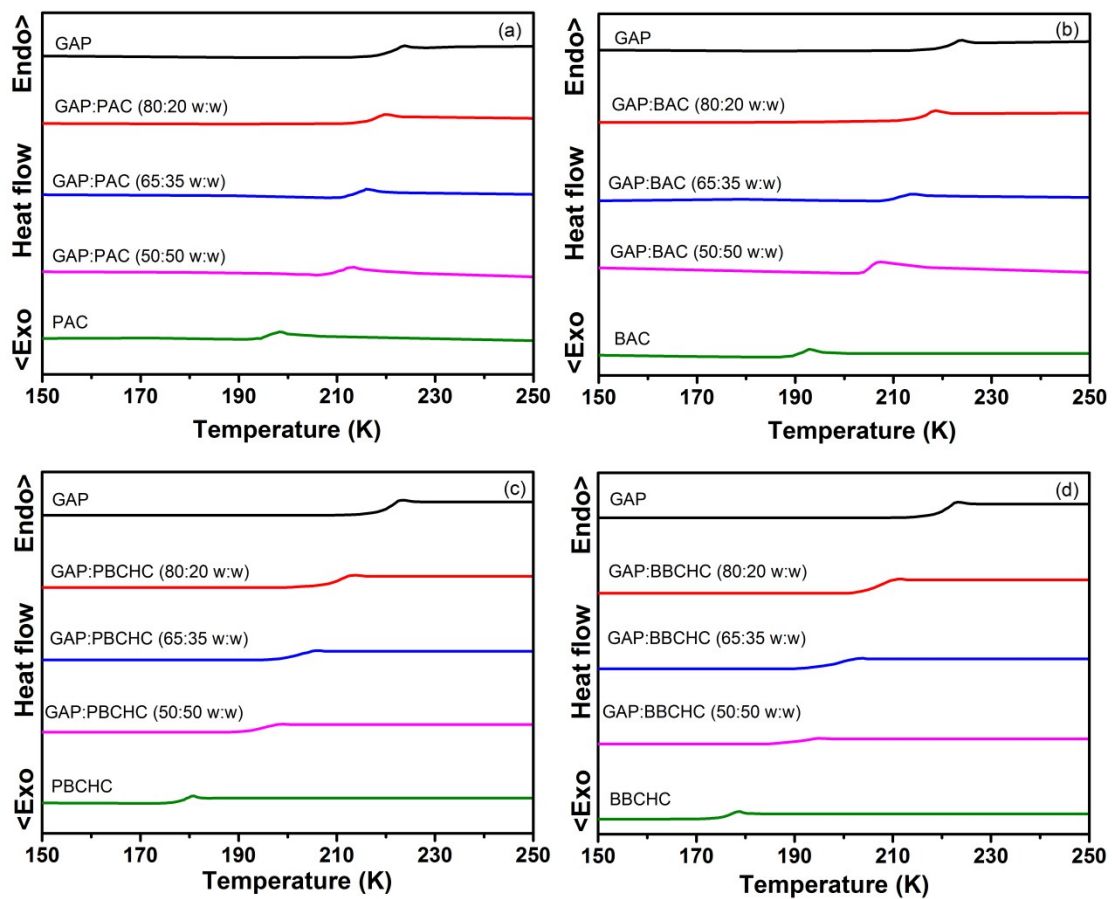

**Fig. S11.** DSC thermograms of (a) GAP:PAC; (b) GAP:BAC; (c) GAP:PBCHC; (d) GAP: BBCHC.



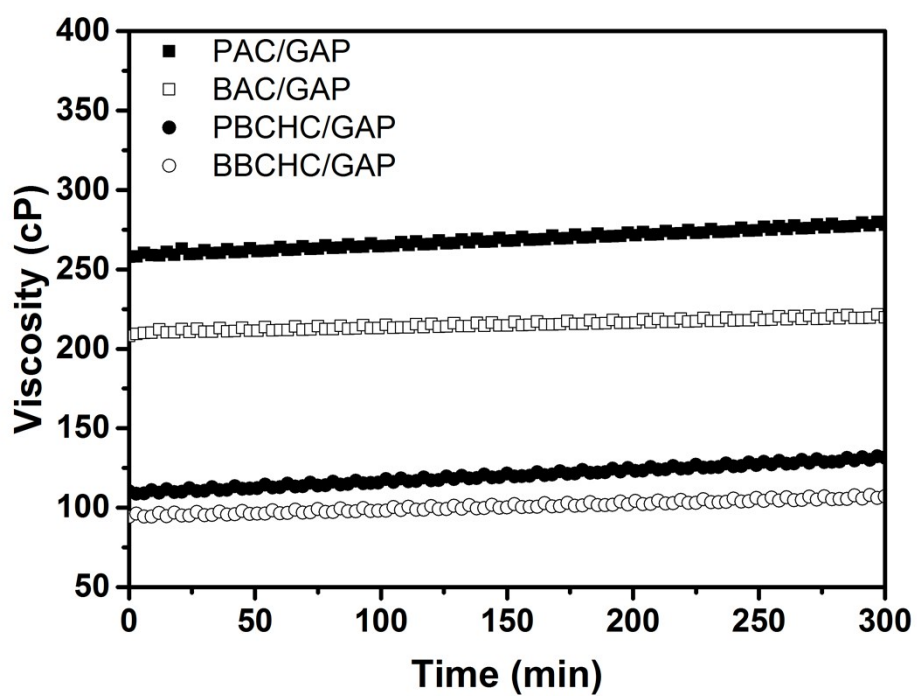

**Fig. S12.** Viscosity vs. time for binary mixtures of RCAPs/GAP prepolymer (50/50 w/w) isothermally at 30 °C.

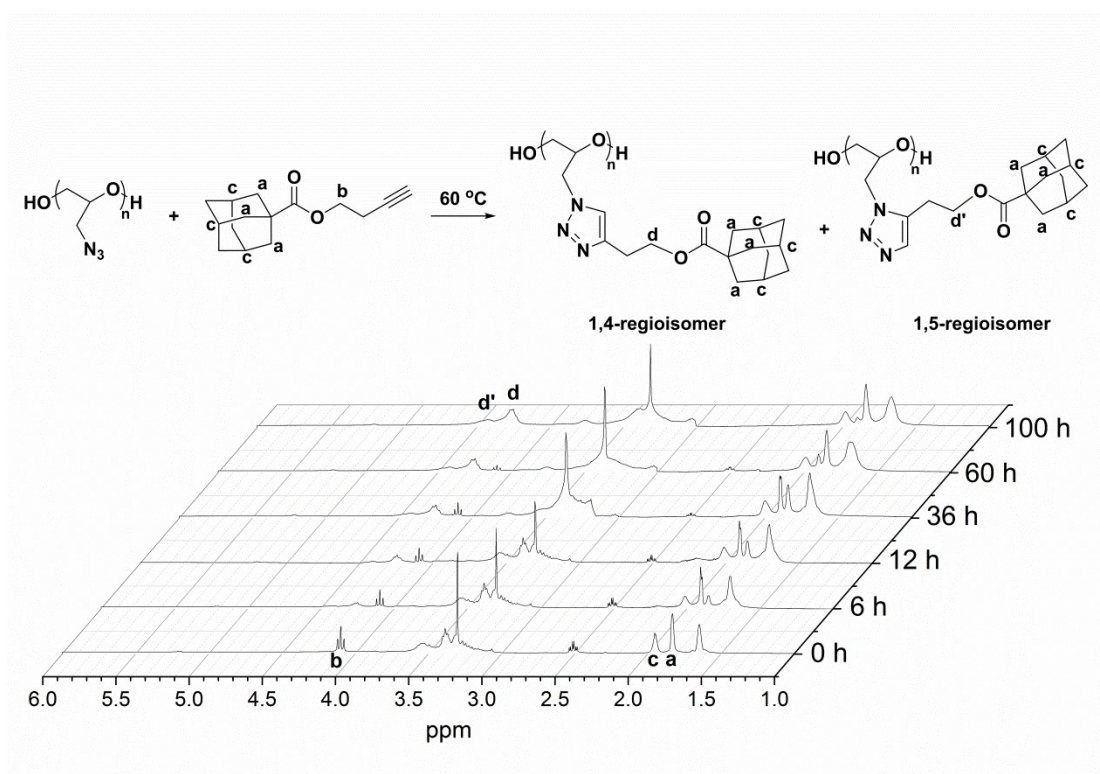

**Fig. S13.** <sup>1</sup>H NMR spectra as a function of reaction time of Cu-free azide-alkyne 1,3-DPCA reaction of BAC ( $n=2$ ) and GAP prepolymer carried out in bulk condition at 60 °C.

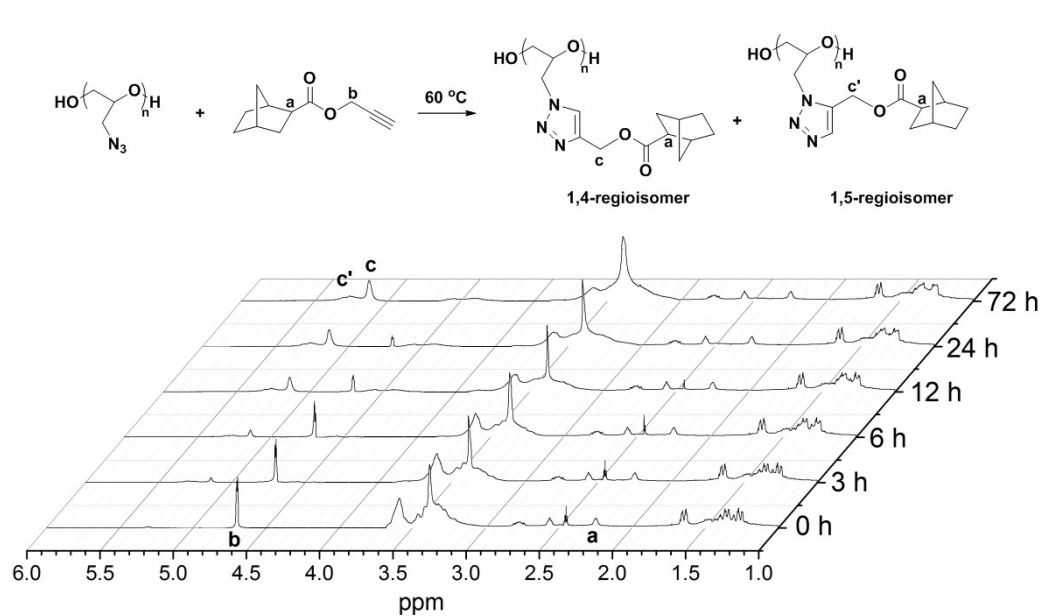

**Fig. S14.** <sup>1</sup>H NMR spectra as a function of reaction time of Cu-free azide-alkyne 1,3-DPCA reaction of PBCHC ( $n=1$ ) and GAP prepolymer carried out in bulk condition at 60 °C.

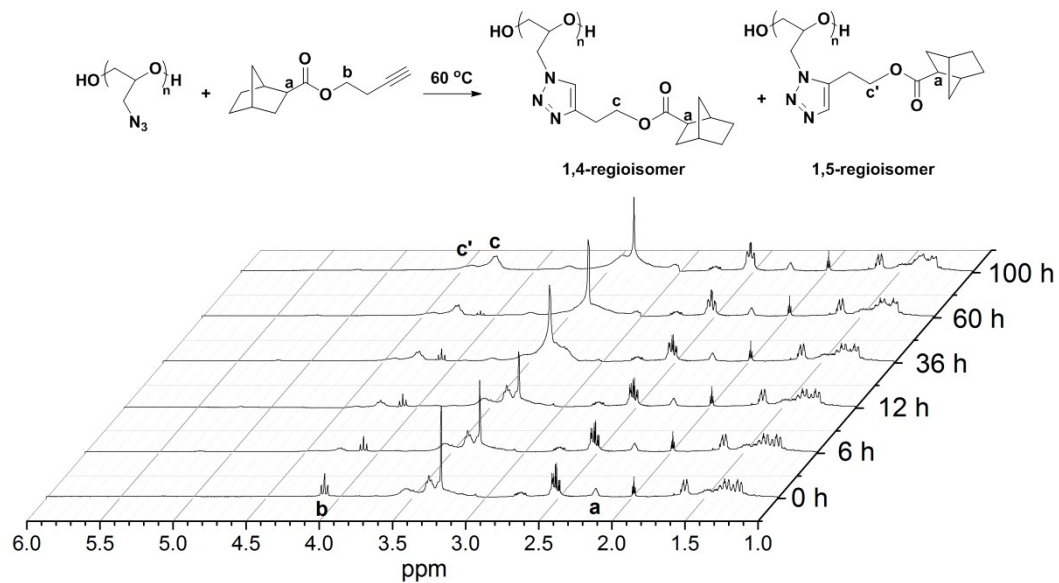

**Fig. S15.**  $^1\text{H}$  NMR spectra as a function of reaction time of Cu-free azide-alkyne 1,3-DPCA reaction of BBCHC ( $n=2$ ) and GAP prepolymer carried out in bulk condition at  $60\text{ }^\circ\text{C}$ .

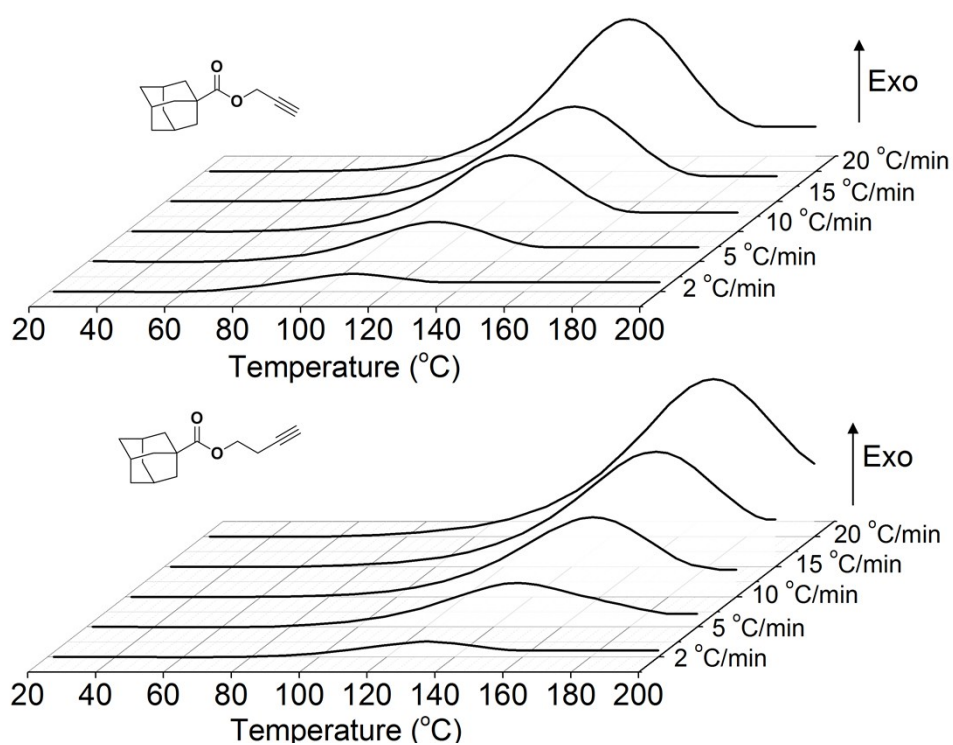

**Fig. S16.** Dynamic DSC curves of PAC ( $n=1$ )/GAP (top) and BAC ( $n=2$ )/GAP (bottom) mixtures at different heating rates.

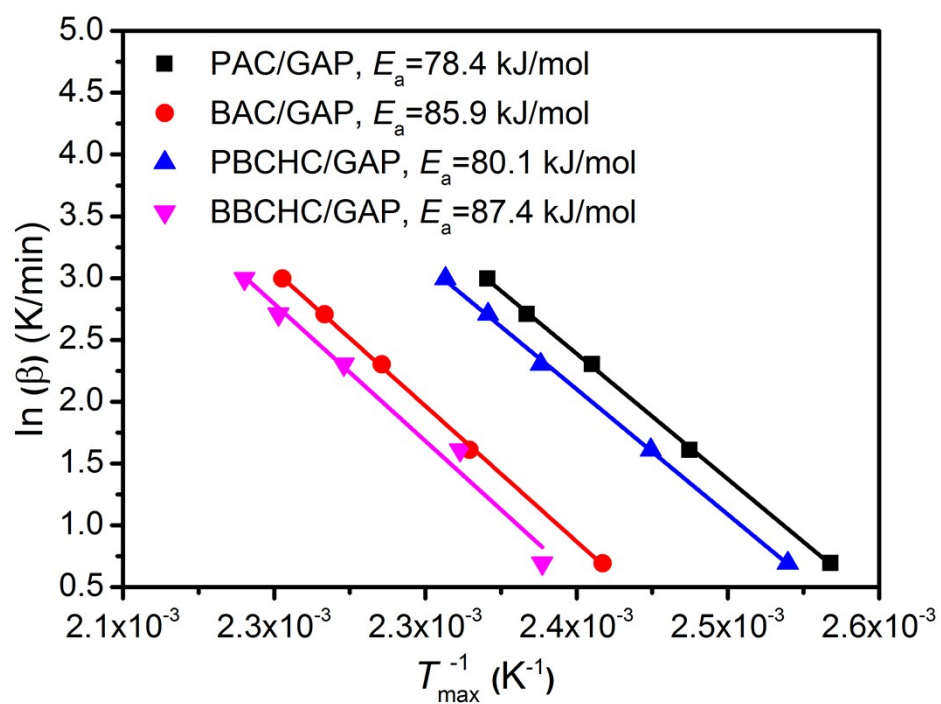

**Fig. S17.** Arrhenius plots of  $\ln(\beta)$  versus  $T - I \max$ . For all samples, the linear fitting coefficient of determination ( $R^2$ ) was greater than 0.99. Activation energy,  $E_a$  was determined by plotting  $\ln(\beta)$  against  $T - I \max$ .

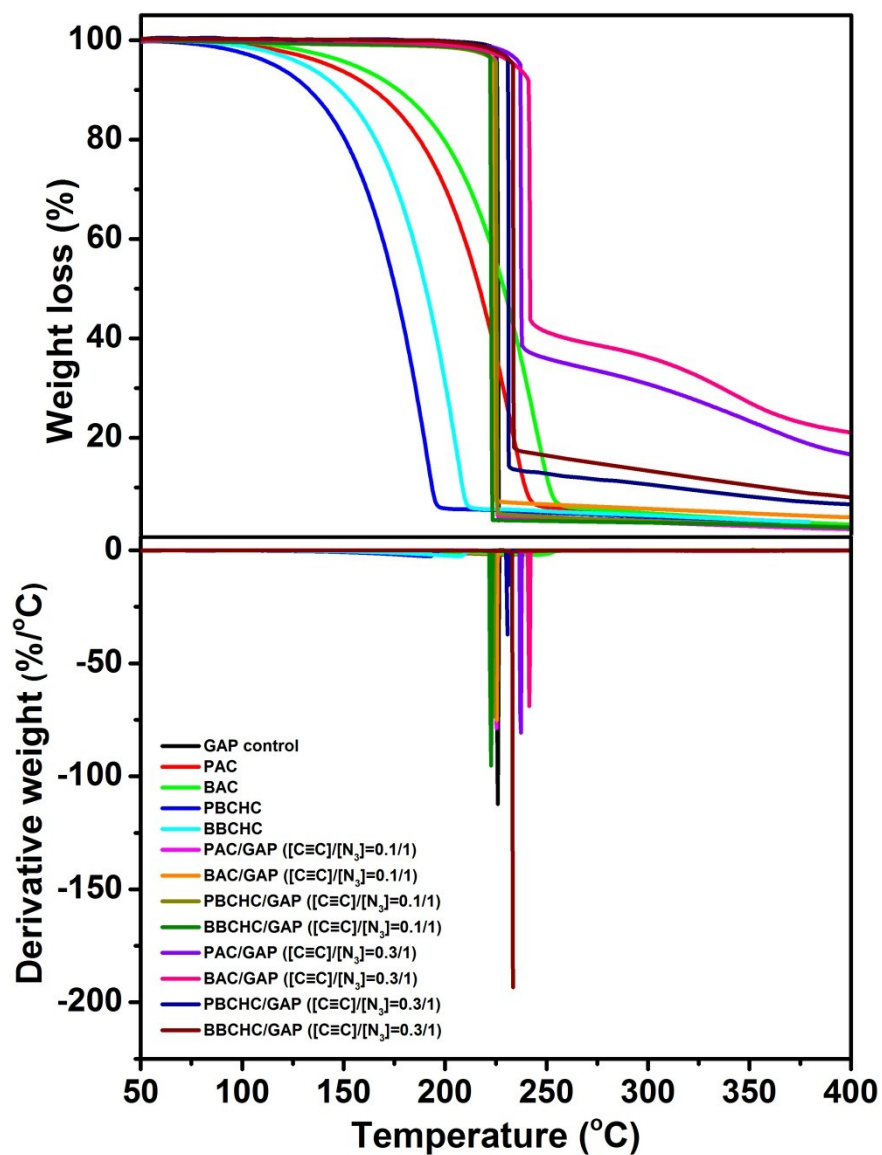

**Fig. S18.** TGA (top) and DTG (bottom) curves of the RCAPs and RCAPs/GAP-based PUs.

Table S1. Computational results of orbital energies at the B3LYP/6-31G\* level of theory (eV).

| Dipole                                                                              | HOMO   | LUMO   |
|-------------------------------------------------------------------------------------|--------|--------|
| 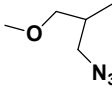   | -6.734 | -0.776 |
| Dipolarophile                                                                       | HOMO   | LUMO   |
|    | -7.071 | 0.265  |
|    | -7.074 | 0.331  |
|    | -7.245 | 0.182  |
|  | -7.256 | 0.251  |

**1-Azido-3-methoxy-2-methylpropane**

Alpha occ. eigenvalues -- -0.24749

Alpha virt. eigenvalues -- -0.02851 0.01165 0.08848 0.10733 0.11392

**PAC**

Alpha occ. eigenvalues -- -0.25988

Alpha virt. eigenvalues -- 0.00973 0.02403 0.04939 0.06827 0.11372

**BAC**

Alpha occ. eigenvalues -- -0.25998

Alpha virt. eigenvalues -- 0.01218 0.04736 0.05478 0.06574 0.10426

**PBCHC**

Alpha occ. eigenvalues -- -0.26627

Alpha virt. eigenvalues -- 0.00668 0.02416 0.04904 0.08140 0.10440

**BBCHC**

Alpha occ. eigenvalues -- -0.26668

Alpha virt. eigenvalues -- 0.00923 0.04727 0.05470 0.08036 0.09919



Table S2. Percentage of carbon (C), hydrogen (H), oxygen (O) and nitrogen (N), and empirical formula for GAP and respective RCAP/GAP polymers.

| PU <sup>a</sup> | Elemental analysis (wt.%) |           |           |           | Experimental formula for 100 g                                          |
|-----------------|---------------------------|-----------|-----------|-----------|-------------------------------------------------------------------------|
|                 | C<br>±0.6                 | H<br>±0.4 | O<br>±1.1 | N<br>±0.4 |                                                                         |
| GAP             | 38.5                      | 5.3       | 17.0      | 39.2      | C <sub>3.20</sub> H <sub>5.27</sub> O <sub>1.06</sub> N <sub>2.80</sub> |
| PAC/GAP         | 52.6                      | 6.5       | 15.8      | 25.1      | C <sub>4.38</sub> H <sub>6.44</sub> O <sub>0.99</sub> N <sub>1.79</sub> |
| BAC/GAP         | 53.5                      | 6.6       | 15.4      | 24.5      | C <sub>4.46</sub> H <sub>6.49</sub> O <sub>0.97</sub> N <sub>1.75</sub> |
| PBCHC/GAP       | 49.1                      | 6.1       | 17.9      | 26.9      | C <sub>4.09</sub> H <sub>6.02</sub> O <sub>1.12</sub> N <sub>1.92</sub> |
| BBCHC/GAP       | 50.6                      | 6.3       | 16.9      | 26.2      | C <sub>4.21</sub> H <sub>6.22</sub> O <sub>1.05</sub> N <sub>1.88</sub> |

<sup>a</sup>Mole ratio of [C≡C]/[N<sub>3</sub>]= 0.3/1
